# Supplementary material for: Exogenous Application of Multi-Walled Carbon Nanotubes (MWCNTs) and Nano-Selenium (Nano-Se) Alleviated the PEG-Induced Water Deficit Stress and Improved the Crop Performance of Camelina
Source: MDPI journal article supplement (doi:10.3390/agronomy13040979), 2023-03-25
Supplement: s1 [file s1]

**Supplementary Table S1.** Summary of parameters estimated from the log-logistic dose-response model (Eq. 1) fitted to the seedling root length of the fifteen camelina genotypes. The values in parentheses are the standard error of each parameter.

| Accessions no. | Parameters |              |                  | Statistics |        |                |                | <i>p</i> value for lack-of-fit test |
|----------------|------------|--------------|------------------|------------|--------|----------------|----------------|-------------------------------------|
|                | b          | c            | GR <sub>50</sub> | DF         | F      | R <sup>2</sup> | <i>p</i> value |                                     |
| CamK1          | 33.6       | 129.8 (12.5) | 25.5 (7.3)       | 12         | 167.4  | 0.90           | < 0.001***     | 0.97                                |
| CamK2          | 33.1       | 154.8 (12.5) | 25.0 (0.5)       | 12         | 99.5   | 0.78           | < 0.001***     | 0.83                                |
| CamK3          | 39.9       | 143.9 (12.5) | 24.7 (3.3)       | 12         | 1312.5 | 0.83           | < 0.001***     | 0.73                                |
| CamK4          | 83.8       | 132.0 (12.4) | 30.7 (4.8)       | 12         | 13.4   | 0.87           | 0.002**        | 0.91                                |
| CamK5          | 3.4        | 97.1 (19.0)  | 22.0 (5.3)       | 12         | 15.7   | 0.93           | 0.0008***      | 0.16                                |
| CamK6          | 56.9       | 112.1 (12.5) | 25.3 (14.0)      | 12         | 6.1    | 0.96           | 0.02*          | 0.70                                |
| CamK7          | 86.2       | 127.2 (12.5) | 24.7 (4.2)       | 12         | 173.3  | 0.91           | < 0.001***     | 0.91                                |
| CamK8          | 3.0        | 99.3 (17.8)  | 19.0 (4.5)       | 12         | 18.5   | 0.99           | 0.0004***      | 0.04                                |
| CamK9          | 64.0       | 130.2 (10.2) | 34.3 (14.0)      | 12         | 86.7   | 0.91           | < 0.001***     | 0.92                                |
| CamK10         | 21.2       | 176.0 (12.5) | 26.8 (11.8)      | 12         | 120.9  | 0.74           | < 0.001***     | 0.96                                |
| CamK11         | 29.2       | 139.7 (12.5) | 26.5 (11.8)      | 12         | 402.1  | 0.87           | < 0.001***     | 0.96                                |
| CamC2          | 38.9       | 119.7 (12.5) | 24.8 (4.7)       | 12         | 58.4   | 0.94           | < 0.001***     | 0.95                                |
| CamC3          | 39.8       | 132.0 (12.5) | 25.7 (6.8)       | 12         | 117.7  | 0.89           | < 0.001***     | 0.87                                |
| CamC4          | 12.7       | 147.3 (12.5) | 29.3 (3.5)       | 12         | 97.3   | 0.83           | < 0.001***     | 0.95                                |
| ‘SO-40’        | 34.3       | 124.5 (12.5) | 25.3 (2.5)       | 12         | 30.6   | 0.92           | < 0.001***     | 0.95                                |

c, upper limit; b, slope of curve; GR<sub>50</sub>, the PEG dose required to inhibit the seedling root length of the camelina genotype by 50% compared with the untreated control. DF, degree of freedom; R<sup>2</sup>: coefficient of determination.

\*, \*\*, and \*\*\* represent significant at 0.05, 0.01, and 0.001 probability level, respectively.
